# Supplementary material for: Stool Screening for Campylobacter Species in Hypogammaglobulinemic Patients Receiving Immunoglobulin Therapy
Source: Research Square preprint supplement (doi:10.21203/rs.3.rs-6792634/v1), 2025-07-11
Supplement: Supplementary file 1 [file 18853776f3dafe940f566532.docx]

**Tables**

| **Table S1.** Demographic and immunological (immunoglobulin) characteristics of the patients based on their underlying immunodeficiency | | | | | | | | | | | | |
| --- | --- | --- | --- | --- | --- | --- | --- | --- | --- | --- | --- | --- |
| **Parameters** | **Total patients (n = 73)** | | | | **PHG (n = 53)** | | | | **SHG (n = 20)** | | | |
|  | **Q1** | **Median** | **Q3** | **NA** | **Q1** | **Median** | **Q3** | **NA** | **Q1** | **Median** | **Q3** | **NA** |
| Age | 48 | 61 | 71 | 0 | 43 | 53 | 64 | 0 | 70 | 73 | 78 | 0 |
| Female sex, n (%) | 42 (57.5) | | | | 34 (64.2) | | | | 8 (40) | | | |
| **Immunoglobulin (g/L)** | 1.900 | 4.300 | 5.600 | 26 | 2.400 | 4.950 | 6.425 | 25 | 1.900 | 3.600 | 4.550 | 1 |
| IgG (g/L) | 3.183 | 4.535 | 5.900 | 27 | 2.480 | 4.580 | 6.370 | 20 | 4.100 | 4.350 | 5.070 | 7 |
| IgA (g/L) | 0.110 | 0.710 | 1.330 | 24 | 0.050 | 0.710 | 1.270 | 20 | 0.335 | 0.665 | 1.400 | 4 |
| IgM (g/L) | 0.158 | 0.322 | 0.771 | 25 | 0.256 | 0.482 | 0.840 | 20 | 0.110 | 0.160 | 0.560 | 5 |
| IgG1 (g/L) | 2.270 | 2.890 | 3.770 | 44 | 2.155 | 2.825 | 3.835 | 29 | 2.530 | 2.930 | 3.020 | 15 |
| IgG2 (g/L) | 0.898 | 1.210 | 1.770 | 44 | 0.720 | 1.140 | 1.775 | 29 | 1.270 | 1.430 | 1.700 | 15 |
| IgG3 (g/L) | 0.169 | 0.288 | 0.489 | 44 | 0.181 | 0.346 | 0.517 | 29 | 0.169 | 0.173 | 0.281 | 15 |
| IgG4 (g/L) | 0.002 | 0.081 | 0.133 | 44 | 0.002 | 0.063 | 0.128 | 29 | 0.086 | 0.169 | 0.403 | 15 |
| NA not available; PHG primary hypogammaglobulinemia; SHG secondary hypogammaglobulinemia | | | | | | | | | | | | |

| **Table S2.** Immunological (B Lymphocyte subsets) characteristics of the patients based on their underlying immunodeficiency | | | | | | | | | | | | |
| --- | --- | --- | --- | --- | --- | --- | --- | --- | --- | --- | --- | --- |
| **Parameters** | **Total patients (n = 73)** | | | | **PHG (n = 53)** | | | | **SHG (n = 20)** | | | |
|  | **Q1** | **Median** | **Q3** | **NA** | **Q1** | **Median** | **Q3** | **NA** | **Q1** | **Median** | **Q3** | **NA** |
| **BL (G/L)** | 0.064 | 0.155 | 0.270 | 18 | 0.068 | 0.160 | 0.242 | 5 | 0.002 | 0.063 | 0.411 | 13 |
| Naïve (%) | 60.68 | 71.26 | 85.22 | 27 | 59.50 | 69.65 | 87.09 | 11 | 77.83 | 81.41 | 83.13 | 16 |
| Unswitched memory (%) | 4.03 | 15.77 | 24.56 | 27 | 4.03 | 16.28 | 24.56 | 11 | 3.83 | 7.95 | 15.18 | 16 |
| Switched memory (%) | 1.19 | 5.10 | 10.15 | 27 | 1.04 | 5.25 | 10.15 | 11 | 3.97 | 4.85 | 7.13 | 16 |
| CD27- memory (%) | 0.96 | 2.37 | 5.59 | 58 | 1.07 | 2.38 | 6.90 | 40 | 1.05 | 1.49 | 1.93 | 18 |
| CD 21+ (%) | 88.21 | 92.68 | 95.03 | 40 | 87.74 | 92.68 | 94.99 | 22 | 90.28 | 92.35 | 94.41 | 18 |
| CD 21- (%) | 4.97 | 7.32 | 11.79 | 40 | 5.02 | 7.32 | 12.27 | 22 | 5.59 | 7.66 | 9.72 | 18 |
| Transitional (%) | 0.76 | 1.28 | 2.44 | 31 | 0.76 | 1.28 | 2.44 | 15 | 0.83 | 1.36 | 2.45 | 16 |
| Plasmablast (%) | 0.04 | 0.13 | 0.31 | 31 | 0.05 | 0.15 | 0.40 | 15 | 0.02 | 0.03 | 0.03 | 16 |
| CD21low CD38low (%) | 0.75 | 1.25 | 3.69 | 62 | 0.55 | 2.67 | 4.68 | 44 | 1.14 | 1.18 | 1.21 | 18 |
| BL B lymphocytes; NA not available; PHG primary hypogammaglobulinemia; SHG secondary hypogammaglobulinemia | | | | | | | | | | | | |

| **Table S3.** Immunological (T Lymphocyte subsets) characteristics of the patients based on their underlying immunodeficiency | | | | | | | | | | | | |
| --- | --- | --- | --- | --- | --- | --- | --- | --- | --- | --- | --- | --- |
| **Parameters** | **Total patients (n = 73)** | | | | **PHG (n = 53)** | | | | **SHG (n = 20)** | | | |
|  | **Q1** | **Median** | **Q3** | **NA** | **Q1** | **Median** | **Q3** | **NA** | **Q1** | **Median** | **Q3** | **NA** |
| **CD4+ T-cells count** |  |  |  |  |  |  |  |  |  |  |  |  |
| **(CD 27, CD45 RA)** |  |  |  |  |  |  |  |  |  |  |  |  |
| CM (%) | 45.98 | 54.23 | 62.51 | 52 | 44.13 | 52.91 | 64.29 | 34 | 55.07 | 55.92 | 56.76 | 18 |
| CM (G/L) | 0.222 | 0.296 | 0.352 | 52 | 0.223 | 0.296 | 0.333 | 34 | 0.208 | 0.265 | 0.321 | 18 |
| Naïve (%) | 14.94 | 32.80 | 43.36 | 52 | 11.80 | 32.80 | 44.57 | 34 | 31.32 | 35.24 | 39.16 | 18 |
| Naïve (G/L) | 0.058 | 0.159 | 0.279 | 52 | 0.053 | 0.159 | 0.279 | 34 | 0.129 | 0.186 | 0.243 | 18 |
| EM (%) | 4.25 | 9.61 | 16.91 | 52 | 4.50 | 9.61 | 17.25 | 34 | 5.56 | 8.46 | 11.37 | 18 |
| EM (G/L) | 0.026 | 0.046 | 0.074 | 52 | 0.030 | 0.054 | 0.088 | 34 | 0.023 | 0.028 | 0.033 | 18 |
| TEMRA (%) | 0.20 | 1.75 | 2.41 | 52 | 0.22 | 1.76 | 2.49 | 34 | 0.21 | 0.38 | 0.56 | 18 |
| TEMRA (G/L) | 0.001 | 0.009 | 0.013 | 52 | 0.001 | 0.010 | 0.014 | 34 | 0.001 | 0.001 | 0.001 | 18 |
| **(CCR7, CD45 RA)** |  |  |  |  |  |  |  |  |  |  |  |  |
| CM (%) | 34.13 | 46.87 | 53.09 | 54 | 33.09 | 43.99 | 53.13 | 35 | 52.76 | 52.76 | 52.76 | 19 |
| Naïve (%) | 17.09 | 36.85 | 44.06 | 54 | 14.83 | 34.42 | 44.46 | 35 | 42.96 | 42.96 | 42.96 | 19 |
| EM (%) | 11.70 | 16.48 | 34.60 | 54 | 11.77 | 16.52 | 37.71 | 35 | 3.76 | 3.76 | 3.76 | 19 |
| TEMRA (%) | 0.93 | 1.84 | 3.08 | 54 | 0.96 | 1.90 | 3.12 | 35 | 0.51 | 0.51 | 0.51 | 19 |
| **CD8+ T-cells count** |  |  |  |  |  |  |  |  |  |  |  |  |
| **(CD 27, CD45 RA)** |  |  |  |  |  |  |  |  |  |  |  |  |
| CM (%) | 20.42 | 31.84 | 39.09 | 52 | 18.57 | 30.73 | 38.73 | 34 | 37.85 | 41.19 | 44.54 | 18 |
| CM (G/L) | 0.063 | 0.096 | 0.121 | 52 | 0.056 | 0.099 | 0.122 | 34 | 0.070 | 0.071 | 0.072 | 18 |
| Naïve (%) | 27.37 | 37.34 | 50.55 | 52 | 25.98 | 37.34 | 48.74 | 34 | 38.72 | 46.04 | 53.35 | 18 |
| Naïve (G/L) | 0.066 | 0.107 | 0.159 | 52 | 0.070 | 0.107 | 0.162 | 34 | 0.066 | 0.086 | 0.107 | 18 |
| EM (%) | 3.02 | 6.40 | 11.52 | 52 | 3.32 | 6.40 | 10.82 | 34 | 5.08 | 8.43 | 11.79 | 18 |
| EM (G/L) | 0.007 | 0.014 | 0.043 | 52 | 0.007 | 0.014 | 0.050 | 34 | 0.008 | 0.013 | 0.017 | 18 |
| TEMRA (%) | 6.40 | 21.20 | 27.57 | 52 | 11.53 | 24.83 | 28.01 | 34 | 3.73 | 4.35 | 4.96 | 18 |
| TEMRA (G/L) | 0.008 | 0.062 | 0.092 | 52 | 0.032 | 0.065 | 0.116 | 34 | 0.007 | 0.007 | 0.008 | 18 |
| **(CCR7, CD45 RA)** |  |  |  |  |  |  |  |  |  |  |  |  |
| CM (%) | 8.45 | 10.71 | 16.45 | 54 | 8.42 | 10.53 | 14.54 | 35 | 18.17 | 18.17 | 18.17 | 19 |
| Naïve (%) | 13.39 | 19.30 | 38.26 | 54 | 13.36 | 18.18 | 36.84 | 35 | 46.06 | 46.06 | 46.06 | 19 |
| EM (%) | 15.72 | 27.63 | 37.10 | 54 | 15.53 | 27.79 | 38.25 | 35 | 16.22 | 16.22 | 16.22 | 19 |
| TEMRA (%) | 23.55 | 34.49 | 42.60 | 54 | 26.05 | 34.93 | 42.99 | 35 | 19.56 | 19.56 | 19.56 | 19 |
| CM central memory; EM effector memory; NA not available; PHG primary hypogammaglobulinemia; SHG secondary hypogammaglobulinemia; TEMRA effector memory expressing CD45RA | | | | | | | | | | | | |

| **Table S4.** Immunological (T Lymphocytes HLA-DR+) characteristics of the patients based on their underlying immunodeficiency | | | | | | | | | | | | |
| --- | --- | --- | --- | --- | --- | --- | --- | --- | --- | --- | --- | --- |
| **Parameters** | **Total patients (n = 73)** | | | | **PHG (n = 53)** | | | | **SHG (n = 20)** | | | |
|  | **Q1** | **Median** | **Q3** | **NA** | **Q1** | **Median** | **Q3** | **NA** | **Q1** | **Median** | **Q3** | **NA** |
| **T Lymphocytes HLA-DR** |  |  |  |  |  |  |  |  |  |  |  |  |
| CD3- DR+ (%) | 13.48 | 36.88 | 66.05 | 6 | 13.48 | 38.38 | 68.86 | 3 | 14.39 | 36.36 | 57.01 | 3 |
| CD3- DR+ (G/L) | 0.087 | 0.186 | 0.240 | 52 | 0.130 | 0.216 | 0.243 | 37 | 0.069 | 0.085 | 0.087 | 15 |
| CD3+ DR+ (%) | 4.74 | 7.51 | 11.83 | 6 | 4.16 | 6.25 | 10.10 | 3 | 6.42 | 10.21 | 13.53 | 3 |
| CD3+ DR+ (G/L) | 0.071 | 0.099 | 0.189 | 52 | 0.074 | 0.100 | 0.167 | 37 | 0.071 | 0.099 | 0.293 | 15 |
| CD4+ DR+ (%) | 2.99 | 4.82 | 6.63 | 6 | 2.84 | 4.80 | 6.69 | 3 | 4.18 | 5.45 | 6.33 | 3 |
| CD4+ DR+ (G/L) | 0.031 | 0.048 | 0.077 | 51 | 0.036 | 0.051 | 0.072 | 37 | 0.031 | 0.040 | 0.077 | 14 |
| CD8+ DR+ (%) | 3.23 | 6.69 | 13.50 | 6 | 3.04 | 6.29 | 10.94 | 3 | 5.18 | 13.51 | 16.70 | 3 |
| CD8+ DR+ (G/L) | 0.031 | 0.042 | 0.118 | 51 | 0.029 | 0.041 | 0.105 | 37 | 0.040 | 0.076 | 0.164 | 14 |
| NA not available; PHG primary hypogammaglobulinemia; SHG secondary hypogammaglobulinemia | | | | | | | | | | | | |

| **Table S5.** Immunological (Gamma-Delta T Lymphocytes, Tregs, NKT) characteristics of the patients based on their underlying immunodeficiency | | | | | | | | | | | | |
| --- | --- | --- | --- | --- | --- | --- | --- | --- | --- | --- | --- | --- |
| **Parameters** | **Total patients (n = 73)** | | | | **PHG (n = 53)** | | | | **SHG (n = 20)** | | | |
|  | **Q1** | **Median** | **Q3** | **NA** | **Q1** | **Median** | **Q3** | **NA** | **Q1** | **Median** | **Q3** | **NA** |
| **Gamma-Delta T Lymphocytes** |  |  |  |  |  |  |  |  |  |  |  |  |
| GD total (%) | 1.83 | 2.72 | 3.91 | 48 | 1.78 | 2.61 | 3.42 | 30 | 6.36 | 8.54 | 10.71 | 18 |
| GD total (G/L) | 0.023 | 0.044 | 0.071 | 48 | 0.022 | 0.037 | 0.073 | 30 | 0.055 | 0.059 | 0.064 | 18 |
| Vδ2 (%) | 0.27 | 0.76 | 2.35 | 39 | 0.25 | 0.68 | 2.21 | 20 | 11.71 | 11.71 | 11.71 | 19 |
| non-Vδ2 (%) | 1.32 | 1.63 | 2.62 | 63 | 1.32 | 1.63 | 2.62 | 43 |  |  |  |  |
| Naïve (%) | 18.80 | 21.14 | 23.28 | 69 | 18.80 | 21.14 | 23.28 | 49 |  |  |  |  |
| Memory RA + (%) | 61.49 | 63.28 | 66.59 | 69 | 61.49 | 63.28 | 66.59 | 49 |  |  |  |  |
| Central memory (%) | 4.86 | 9.98 | 14.82 | 69 | 4.86 | 9.98 | 14.82 | 49 |  |  |  |  |
| Effector memory (%) | 0.41 | 2.09 | 6.23 | 69 | 0.41 | 2.09 | 6.23 | 49 |  |  |  |  |
| CD 27 +, CD 16 + (%) | 2.36 | 3.79 | 6.62 | 69 | 2.36 | 3.79 | 6.62 | 49 |  |  |  |  |
| CD 27 -, CD 16+ (%) | 24.42 | 27.48 | 34.82 | 69 | 24.42 | 27.48 | 34.82 | 49 |  |  |  |  |
| CD 27 +, CD 16- (%) | 23.29 | 24.98 | 27.32 | 69 | 23.29 | 24.98 | 27.32 | 49 |  |  |  |  |
| CD 27 -, CD 16- (%) | 33.22 | 40.60 | 44.80 | 69 | 33.22 | 40.60 | 44.80 | 49 |  |  |  |  |
| **Tregs (%)** | 2.01 | 3.13 | 4.51 | 44 | 2.01 | 3.06 | 3.80 | 25 | 7.43 | 7.43 | 7.43 | 19 |
| Tregs (G/L) | 0.027 | 0.038 | 0.051 | 53 | 0.027 | 0.038 | 0.051 | 33 |  |  |  |  |
| **NKT (%)** | 1.26 | 3.06 | 4.45 | 29 | 1.32 | 3.34 | 4.61 | 17 | 1.00 | 1.42 | 2.82 | 12 |
| NKT (G/L) | 0.012 | 0.042 | 0.087 | 29 | 0.014 | 0.042 | 0.087 | 17 | 0.012 | 0.036 | 0.084 | 12 |
| GD gamma-delta; NA not available; NKT natural killer T-cells; PHG primary hypogammaglobulinemia; SHG secondary hypogammaglobulinemia; Tregs regulatory T-cells | | | | | | | | | | | | |

| **Table S6.** Summary of the genomics for the *Campylobacter* and *Aliarcobacter* strains | | | | | | | |
| --- | --- | --- | --- | --- | --- | --- | --- |
| **Patient N°** | **Date** | **Identification (ANI score)** | **CC** | **ST** | **cgMLST (%)** | **Source attribution** | **Resistome** |
| **64** | 11/22/22 | *C. jejuni* (98.9%) | 21 | 50 | 194,939 (98.7%) | Poultry | *blaOXA61*, T86I |
| **53** | 07/23/23 | *C. coli* (99.1%) | 828 | 827 | 124,299 (98.1%) | Poultry | *tetO, ant(6)-Ig* |
| **59** | 11/21/23 | *C. jejuni* (99%) | 21 | 141 | Unknown | Ruminant | *blaOXA61, tetO* |
| **36** | 01/15/24 | *A. butzleri* (99.9%) | ND | ND | ND | ND | T86I |
| **54** | 03/20/24 | *C. jejuni* (99.1%) | 21 | 19 | 120,355(98.9%) | Poultry | T86I |
| **27** | 04/18/24 | *C. coli* (99%) | 828 | 832 | Unknown | Poultry | *blaOXA61*, T86I, A2075G, *tetO* |
| **29** | 07/26/23 | *C. coli* (98.9%) | 828 | 860 | 162,412 (85.4%) | Poultry | *tetO* |
| **29** | 08/22/23 | *C. jejuni* (99%) | 21 | 21 | 48,427 (97.4%) | Ruminant | *blaOXA61,* T86I*, tetO* |
| **29** | 08/22/23 | *C. coli* (99.1%) | 828 | 832 | Unknown | Poultry | *tetO* |
| **29** | 11/30/23 | *C. jejuni* (99%) | 21 | 21 | 48,427 (97.4%) | Ruminant | *blaOXA61,* T86I*, tetO* |
| CC: clonal complex; cgMLST: core genome Multilocus Sequence Typing; ND: not determined; ST: sequence type.  *blaOXA61*: β-lactamase associated with group A penicillin resistance; T86I: mutation identified in the *gyrase A* gene associated with fluoroquinolone resistance; *tetO*: gene associated with tetracycline resistance; *ant(6)-Ig*: aminoglycoside nucleotidyl-transferase associated with streptomycin resistance; A2075G: mutation in the *23 rDNA* gene associated with macrolide resistance. | | | | | | | |

| **Table S7.** Comparison between Campylobacter positive and negative patients on demographic and clinical parameters | | | | | |
| --- | --- | --- | --- | --- | --- |
| **Parameters** | **Negative patients (n = 62)** | **NA** | **Positive patients (n = 11)** | **NA** | **p value** |
| **Demographic characteristics** |  |  |  |  |  |
| Age | 61 (50-71) |  | 60 (40-72) |  | NS |
| **Female sex** | **39 (62.9)** |  | **3 (27.27)** |  | **RR (male) 1.960 (1.089-3.043)**  **p < 0.05** |
| **Underlying condition** |  |  |  |  |  |
| **Primary HG** | **44 (71.0)** |  | **9 (81.82)** |  | NS |
| CVID | 26 (41.9) |  | 6 (54.55) |  | NS |
| Isolated IgG subclass deficiency | 7 (11.3) |  |  |  | NS |
| **Bruton agammaglobulinemia** | **1 (1.6)** |  | **3 (27.27)** |  | **RR 3.536 (1.254-19.42)**  **p < 0.05** |
| CTLA4 deficiency | 2 (3.2) |  | 0 |  | NS |
| Combined immunodeficiency | 4 (6.5) |  | 0 |  | NS |
| Others | 4 (6.5) |  | 0 |  | NS |
| **Secondary HG** | **18 (29.0)** |  | **2 (18.18)** |  | NS |
| Medication-related SHG | 6 (9.7) |  | 1 (9.09) |  | NS |
| Myeloma | 5 (8.1) |  | 0 |  | NS |
| CLL | 2 (3.2) |  | 0 |  | NS |
| Lymphoma | 1 (1.6) |  | 0 |  | NS |
| Mixed | 4 (6.5) |  | 1 (9.09) |  | NS |
| Protein loss | 0 |  | 0 |  |  |
| **Clinical manifestations** |  |  |  |  |  |
| Diarrhea | 12 (19.4) | 1 | 5 (45.45) |  |  |
| Abdominal pain | 6 (9.7) | 1 | 2 (18.18) |  |  |
| Nausea | 3 (4.8) | 1 | 0 (0) |  |  |
| Vomiting | 2 (3.2) | 1 | 0 (0) |  |  |
| Weight loss | 2 (3.2) | 1 | 1 (9.09) |  |  |
| Fecal calprotectin (µg/g) | 53 (20.5-164.5) | 3 | 325 (149-728) | 2 |  |
| IVIG | 44 (72.1) | 1 | 4 (40) | 1 |  |
| Antibiotic use ≥ 3 (< 1 year) | 5 (8.1) |  | 1 (10) | 1 |  |
| CLL chronic lymphocytic leukemia; HG hypogammaglobulinemia; IVIG intravenous immunoglobulin; NA not available; NS not significant; SHG secondary hypogammaglobulinemia; RR relative risk | | | | | |

| **Table S8.** Comparison between Campylobacter positive and negative patients on biological parameters (standard and immunoglobulin) | | | | | |
| --- | --- | --- | --- | --- | --- |
| **Parameters** | **Negative patients (n = 62)** | **NA** | **Positive patients (n = 11)** | **NA** | **p value** |
| **Biology at the time of collection** |  |  |  |  |  |
| Lymphocytes count (G/L) | 1.42 (0.95-1.86) | 5 | 0.93 (0.80-1.58) | 1 |  |
| Neutrophils count (G/L) | 3.66 (2.84-5.14) | 5 | 3.85 (3.23-4.53) | 1 |  |
| CRP (mg/L) | 2.7 (1.4-6.8) | 2 | 3.50 (2.10-17.70) | 2 |  |
| Gammaglobulin count (g/L) | 8.300 (6.800-10.850) | 7 | 8.700 (7.450-10.975) | 1 |  |
| IgG (g/L) | 9.140 (7.780-11.975) | 7 | 10.560 (8.715-11.848) | 1 |  |
| IgA (g/L) | 0.385 (0-1.070) | 6 | 0 (0-0.910) | 1 | NS |
| IgM (g/L) | 0.375 (0.173-0.835) | 8 | 0.263 (0-0.525) | 1 | NS |
| TL CD4 (G/L) | 0.584 (0.395-0.883) | 6 | 0.479 (0.349-0.813) |  |  |
| TL CD8 (G/L) | 0.344 (0.199-0.502) | 6 | 0.379 (0.245-0.596) |  |  |
| BL (G/L) | 0.131 (0.031-0.270) | 8 | 0.068 (0.006-0.164) | 1 |  |
| CD4/CD8 | 1.795 (1.231-2.691) | 6 | 1.590 (1.004-2.031) |  | NS |
| **Immunoglobulin at the time of diagnosis (g/L)** | 4.350 (2.000-5.750) | 20 | 2.300 (1.100-4.400) | 6 | NS |
| IgG (g/L) | 4.580 (3.610-5.960) | 21 | 3.880 (0.700-4.320) | 6 | NS |
| IgA (g/L) | 0.730 (0.149-1.335) | 18 | 0.288 (0.008-1.080) | 6 | NS |
| IgM (g/L) | 0.333 (0.158-0.771) | 18 | 0.255 (0.188-0.638) | 7 | NS |
| IgG1 (g/L) | 2.890 (2.330-3.900) | 35 | 1.705 (0.853-2.558) | 9 |  |
| IgG2 (g/L) | 1.210 (0.914-1.735) | 35 | 1.170 (0.585-1.755) | 9 |  |
| IgG3 (g/L) | 0.292 (0.171-0.545) | 35 | 0.153 (0.132-0.174) | 9 |  |
| IgG4 (g/L) | 0.081 (0.003-0.138) | 35 | 0.067 (0.033-0.100) | 9 |  |
| BL B lymphocytes; NA not available; NS not significant; TL T lymphocytes | | | | | |

| **Table S9.** Comparison between Campylobacter positive and negative patients on biological parameters (B Lymphocyte subsets) | | | | | |
| --- | --- | --- | --- | --- | --- |
| **Parameters** | **Negative patients (n = 62)** | **NA** | **Positive patients (n = 11)** | **NA** | **p value** |
| **BL (G/L)** | 0.165 (0.066-0.271) | 17 | 0.104 (0.001-0.173) | 1 |  |
| Naïve (%) | 69.65 (58.93-84.33) | 22 | 77.74 (71.17-86.64) | 5 | NS |
| Unswitched memory (%) | 15.77 (4.08-25.45) | 22 | 13.12 (4.65-20.55) | 5 | NS |
| Switched memory (%) | 5.33 (1.22-10.42) | 22 | 5.00 (1.84-5.27) | 5 | NS |
| CD 21+ (%) | 93.06 (88.64-95.05) | 34 | 82.53 (81.59-93.36) | 6 |  |
| CD 21- (%) | 6.95 (4.95-11.36) | 34 | 17.47 (6.64-18.41) | 6 |  |
| **Transitional (%)** | **1.52 (1.04-3.07)** | **26** | **0.58 (0.20-1.04)** | **5** | **< 0.05** |
| Plasmablast (%) | 0.11 (0.03-0.34) | 26 | 0.21 (0.13-0.29) | 5 |  |
| CD21low CD38low (%) | 1.96 (0.99-4.18) | 52 | 0.49 | 10 |  |
| BL B lymphocytes; NA not available; NS not significant | | | | | |

| **Table S10.** Comparison between Campylobacter positive and negative patients on biological parameters (T lymphocyte subsets) | | | | | |
| --- | --- | --- | --- | --- | --- |
| **Parameters** | **Negative patients (n = 62)** | **NA** | **Positive patients (n = 11)** | **NA** | **p value** |
| **T4 lymphocytes count** |  |  |  |  |  |
| (CD27, CD45 RA) |  |  |  |  |  |
| CM (%) | 54.56 (46.70-62.19) | 46 | 52.67 (34.28-62.51) | 6 |  |
| CM (G/L) | 0.300 (0.211-0.380) | 46 | 0.285 (0.254-0.303) | 6 |  |
| Naïve (%) | 30.30 (8.32-43.15) | 46 | 41.69 (32.80-45.77) | 6 | NS |
| Naïve (G/L) | 0.124 (0.043-0.261) | 46 | 0.279 (0.159-0.298) | 6 | NS |
| EM (%) | 9.76 (4.62-18.09) | 46 | 5.38 (3.42-14.09) | 6 | NS |
| EM (G/L) | 0.051 (0.025-0.081) | 46 | 0.036 (0.033-0.054) | 6 | NS |
| TEMRA (%) | 1.24 (0.13-2.45) | 46 | 1.76 (0.26-2.35) | 6 |  |
| TEMRA (G/L) | 0.006 (0.001-0.013) | 46 | 0.009 (0.002-0.015) | 6 |  |
| (CCR7, CD45RA) |  |  |  |  |  |
| CM (%) | 44.16 (36.40-52.93) | 48 | 46.87 (23.22-57.23) | 6 |  |
| Naïve (%) | 33.29 (11.40-42.81) | 48 | 41.85 (31.99-45.15) | 6 |  |
| EM (%) | 17.08 (13.02-42.79) | 48 | 11.72 (10.30-16.20) | 6 |  |
| TEMRA (%) | 1.75 (0.75-2.87) | 48 | 1.96 (1.17-3.15) | 6 |  |
| **T8 Lymphocytes count** |  |  |  |  |  |
| (CD 27, CD45 RA) |  |  |  |  |  |
| CM (%) | 30.46 (19.49-41.29) | 46 | 31.84 (30.73-33.38) | 6 |  |
| CM (G/L) | 0.068 (0.047-0.105) | 46 | 0.110 (0.109-0.142) | 6 |  |
| Naïve (%) | 38.36 (28.42-54.76) | 46 | 37.34 (24.58-40.81) | 6 | NS |
| Naïve (G/L) | 0.106 (0.062-0.131) | 46 | 0.159 (0.076-0.176) | 6 | NS |
| **EM (%)** | **3.76 (2.35-7.21)** | **46** | **18.74 (10.11-20.63)** | **6** | **< 0.05** |
| **EM (G/L)** | **0.008 (0.006-0.022)** | **46** | **0.058 (0.043-0.121)** | **6** | **< 0.05** |
| TEMRA (%) | 21.85 (5.05-28.46) | 46 | 21.20 (15.27-24.83) | 6 |  |
| TEMRA (G/L) | 0.053 (0.006-0.104) | 46 | 0.075 (0.065-0.077) | 6 |  |
| (CCR7, CD45RA) |  |  |  |  |  |
| CM (%) | 12.79 (8.49-17.32) | 48 | 10.35 (8.49-10.71) | 6 |  |
| Naïve (%) | 27.08 (15.23-44.14) | 48 | 13.33 (9.15-13.53) | 6 |  |
| EM (%) | 16.78 (12.25-30.90) | 48 | 39.40 (34.80-40.40) | 6 |  |
| TEMRA (%) | 30.58 (19.99-45.42) | 48 | 35.36 (28.77-41.11) | 6 |  |
| CM central memory; EM effector memory; NA not available; NS not significant; TEMRA effector memory expressing CD45RA | | | | | |
